# Supplementary material for: Evaluation of the Effectiveness and Use of Anti-Methicillin-Resistant Staphylococcus aureus Agents for Aspiration Pneumonia in Older Patients Using a Nationwide Japanese Administrative Database
Source: MDPI journal article supplement (doi:10.3390/microorganisms11081905), 2023-07-27
Supplement: s1 [file s1]

**Supplementary Table S1.** Baseline characteristics of patients treated with or without anti-MRSA drug with respiratory failure group (a) and without respiratory failure group (b) before and after adjusting for confounders using the propensity score weighting method

(a)

| Baseline characteristics |                                                      |                                                |         |                                                      |                                                |         |
|--------------------------|------------------------------------------------------|------------------------------------------------|---------|------------------------------------------------------|------------------------------------------------|---------|
| Variables                | Before adjustment                                    |                                                |         | After adjustment                                     |                                                |         |
|                          | Anti-MRSA agents combination group<br><i>n</i> = 515 | Non-anti-MRSA agents group<br><i>n</i> = 54583 | p-value | Anti-MRSA agents combination group<br><i>n</i> = 515 | Non-anti-MRSA agents group<br><i>n</i> = 54583 | p-value |
| Age                      | 83.21 (±8.18)                                        | 85.61 (±7.61)                                  | <0.0001 | 85.23 (±0.35)                                        | 85.58 (±0.03)                                  | 0.31    |
| Sex                      | 66.41%<br>(342/515)                                  | 54.35%<br>(29666/54583)                        | <0.0001 | 58.20%                                               | 54.46%                                         | 0.07    |
| Emergency admission      | 98.64%<br>(7/515)                                    | 98.70%<br>(53873/54583)                        | 0.9073  | 98.29%                                               | 98.71%                                         | 0.641   |

|             |           |               |         |        |        |         |
|-------------|-----------|---------------|---------|--------|--------|---------|
| Emergency   | 75.53%    | 64.00%        | <0.0001 | 64.74% | 64.01% | 0.739   |
| transport   | (389/515) | (34874/54583) |         |        |        |         |
| Respiratory | 7.29%     | 7.77%         | 0.6761  | 5.87%  | 7.29%  | 0.089   |
| medicine    | (40/515)  | (3977/54583)  |         |        |        |         |
| Advanced    | 5.24%     | 2.99%         | 0.0029  | 3.00%  | 3.01%  | 0.999   |
| treatment   | (27/515)  | (1632/54583)  |         |        |        |         |
| hospital    |           |               |         |        |        |         |
| Dementia    | 75.15%    | 70.32%        | <0.0001 | 66.11% | 70.37% | 0.046   |
|             | (128/515) | (16199/54583) |         |        |        |         |
| Coma        | 18.64%    | 10.02%        | 0.0152  | 11.09% | 10.10% | 0.368   |
|             | (96/515)  | (5469/54583)  |         |        |        |         |
| COPD        | 6.21%     | 8.85%         | 0.0359  | 10.33% | 8.83%  | 0.472   |
|             | (32/515)  | (4830/54583)  |         |        |        |         |
| Asthma      | 2.52%     | 4.61%         | 0.0243  | 5.38%  | 4.59%  | 0.57    |
|             | (13/515)  | (2517/54583)  |         |        |        |         |
| NTM         | 0.19%     | 0.17%         | 0.4923  | 0.00%  | 0.37%  | <0.0001 |
|             | (1/515)   | (208/54583)   |         |        |        |         |
| IP          | 1.55%     | 1.59%         | 0.9964  | 1.71%  | 1.59%  | 0.732   |

|                 |           |               |         |        |        |         |
|-----------------|-----------|---------------|---------|--------|--------|---------|
|                 | (8/515)   | (867/54583)   |         |        |        |         |
| Parkinson       | 7.57%     | 6.21%         |         |        |        |         |
|                 |           |               | 0.17    | 0.16%  | 0.17%  | 0.922   |
| syndrome        | (39/515)  | (3338/54583)  |         |        |        |         |
| Sequelae of     |           |               |         |        |        |         |
|                 | 20.39%    | 20.40%        |         |        |        |         |
| cerebrovascular |           |               | 0.9964  | 20.66% | 20.39% | 0.876   |
|                 | (105/515) | (11133/54583) |         |        |        |         |
| disease         |           |               |         |        |        |         |
| Maintenance     | 2.91%     | 0.80%         |         |        |        |         |
|                 |           |               | <0.0001 | 0.98%  | 0.82%  | 0.541   |
| dialysis        | (15/515)  | (436/54583)   |         |        |        |         |
| Emergency       | 0.19%     | 0.00%         |         |        |        |         |
|                 |           |               | <0.0001 | 0.00%  | 0.01%  | 0.441   |
| dialysis        | (1/515)   | (2/54583)     |         |        |        |         |
| Abscess of lung |           |               |         |        |        |         |
|                 | 0.39%     | 0.18%         |         |        |        |         |
| and             |           |               | 0.2613  | 0.61%  | 0.18%  | 0.132   |
|                 | (2/515)   | (97/54583)    |         |        |        |         |
| mediastinum     |           |               |         |        |        |         |
| Pyothorax       | 0.19%     | 0.36%         |         |        |        |         |
|                 |           |               | 0.5291  | 0.00%  | 0.36%  | <0.0001 |
|                 | (1/515)   | (197/54583)   |         |        |        |         |
| Achalasia       | 0.19%     | 0.30%         |         |        |        |         |
|                 |           |               | 0.6514  | 0.04%  | 0.30%  | <0.0001 |
|                 | (1/515)   | (166/54583)   |         |        |        |         |

|                                              |                     |                         |         |        |        |         |
|----------------------------------------------|---------------------|-------------------------|---------|--------|--------|---------|
| Malignant<br>neoplasms                       | 9.71%<br>(50/515)   | 11.22%<br>(6124/54583)  | 0.0118  | 12.34% | 11.21% | 0.485   |
| Malignant<br>neoplasms in the<br>oral cavity | 0.97%<br>(5/515)    | 0.33%<br>(179/54583)    | 0.0304  | 0.11%  | 0.33%  | <0.0001 |
| Malignant<br>neoplasm of the<br>esophagus    | 0.58%<br>(3/515)    | 0.74%<br>(404/54583)    | 0.6776  | 0.31%  | 0.74%  | <0.0001 |
| Additional<br>reimbursement<br>for ICT       | 88.16%<br>(454/515) | 92.24%<br>(50350/54583) | 0.0006  | 93.70% | 92.20% | 0.039   |
| Additional<br>reimbursement<br>for AST       | 55.73%<br>(287/515) | 50.76%<br>(27706/54583) | 0.0248  | 50.83% | 50.80% | 0.99    |
| Surgery                                      | 9.13%<br>(47/515)   | 2.25%<br>(1229/54583)   | <0.0001 | 2.04   | 2.32   | 0.454   |
| IPPV                                         | 16.89%<br>(87/515)  | 3.68%<br>(2006/54583)   | <0.0001 | 2.63%  | 3.79%  | <0.0001 |

|                              |                    |                       |         |       |       |       |
|------------------------------|--------------------|-----------------------|---------|-------|-------|-------|
| NPPV                         | 1.36%<br>(7/515)   | 0.48%<br>(262/54583)  | 0.0044  | 0.87% | 0.50% | 0.288 |
| ICU admission                | 8.54%<br>(44/515)  | 1.11%<br>(607/54583)  | <0.0001 | 1.08% | 1.18% | 0.787 |
| Dopamine                     | 5.24%<br>(27/515)  | 1.36%<br>(744/54583)  | <0.0001 | 1.51% | 1.40% | 0.769 |
| Noradrenaline                | 0.78%<br>(4/515)   | 0.11%<br>(59/54583)   | <0.0001 | 0.21% | 0.11% | 0.507 |
| Steroid                      | 17.67%<br>(91/515) | 8.83%<br>(4819/54583) | <0.0001 | 7.81% | 8.91% | 0.358 |
| Insulin                      | 13.20%<br>(68/515) | 7.17%<br>(3916/54583) | <0.0001 | 6.85% | 7.23% | 0.689 |
| Albumin                      | 6.21%<br>(32/515)  | 0.75%<br>(409/54583)  | <0.0001 | 0.99% | 0.80% | 0.098 |
| Immunoglobulin               | 0.81%<br>(4/515)   | 0.11%<br>(88/54583)   | 0.0009  | 0.08% | 0.12% | 0.276 |
| Anti-influenza<br>virus drug | 1.75%<br>(9/515)   | 1.41%<br>(770/54583)  | 0.5192  | 1.82% | 1.41% | 0.295 |

|                  |           |               |         |        |        |       |
|------------------|-----------|---------------|---------|--------|--------|-------|
| TPN              | 18.25%    | 2.94%         | <0.0001 | 3.36%  | 3.08%  | 0.549 |
|                  | (94/515)  | (1604/54583)  |         |        |        |       |
| Nasal tube       | 12.82%    | 4.11%         | <0.0001 | 4.72%  | 4.19%  | 0.455 |
| feeding          | (66/515)  | (2243/54583)  |         |        |        |       |
| Gastrostomy      | 0.19%     | 0.01%         | 0.0015  | 0.02%  | 0.02%  | 0.687 |
| nutrition        | (1/515)   | (8/54583)     |         |        |        |       |
| Dysphagia        | 10.49%    | 13.01%        | 0.0894  | 12.77% | 12.99% | 0.877 |
| rehabilitation   | (54/515)  | (7103/54583)  |         |        |        |       |
| Penicillin       | 60.58%    | 77.04%        | <0.0001 | 78.30  | 76.88  | 0.34  |
|                  | (312/515) | (42050/54583) |         |        |        |       |
| Macrolide        | 1.55%     | 0.61%         | 0.0068  | 0.42%  | 0.62%  | 0.26  |
|                  | (8/515)   | (334/54583)   |         |        |        |       |
| First-generation | 1.17%     | 0.69%         | 0.2018  | 0.71%  | 0.70%  | 0.975 |
| cephalosporin    | (6/515)   | (379/54583)   |         |        |        |       |
| Second-          |           |               |         |        |        |       |
| generation       | 2.52%     | 1.80%         | 0.2173  | 1.81%  | 1.80%  | 0.975 |
| cephalosporin    | (13/515)  | (981/54583)   |         |        |        |       |

|                                 |                     |                        |         |        |        |       |
|---------------------------------|---------------------|------------------------|---------|--------|--------|-------|
| Third-generation cephalosporin  | 14.37%<br>(74/515)  | 18.07%<br>(9862/54583) | 0.0298  | 16.20% | 18.03% | 0.165 |
| Fourth-generation cephalosporin | 1.55%<br>(8/515)    | 0.84%<br>(459/54583)   | 0.0792  | 0.87%  | 0.85%  | 0.922 |
| Carbapenem                      | 35.73%<br>(184/515) | 5.83%<br>(3181/54583)  | <0.0001 | 6.32%  | 6.11%  | 0.63  |
| Clindamycin                     | 2.33%<br>(12/515)   | 2.21%<br>(1205/54583)  | 0.8507  | 2.72%  | 1.14%  | 0.095 |
| New quinolone (IV)              | 2.33%<br>(12/515)   | 1.43%<br>(783/54583)   | 0.0898  | 2.72%  | 1.14%  | 0.095 |
| New quinolone (PO)              | 0.78%<br>(4/515)    | 0.98%<br>(533/54583)   | 0.646   | 1.07%  | 0.97%  | 0.836 |
| Minocycline                     | 0.58%<br>(3/515)    | 0.63%<br>(346/54583)   | 0.8837  | 0.47%  | 0.63%  | 0.497 |
| Metronidazole                   | 0.19%<br>(1/515)    | 0.14%<br>(77/54583)    | 0.7497  | 0.22%  | 0.14%  | 0.528 |

(b)

| Baseline characteristics |                                    |                            |         |                                    |                            |         |
|--------------------------|------------------------------------|----------------------------|---------|------------------------------------|----------------------------|---------|
| Variables                | Before adjustment                  |                            |         | After adjustment                   |                            |         |
|                          | Anti-MRSA agents combination group | Non-anti-MRSA agents group | p-value | Anti-MRSA agents combination group | Non-anti-MRSA agents group | p-value |
|                          |                                    |                            |         |                                    |                            |         |
|                          |                                    |                            |         |                                    |                            |         |
|                          |                                    |                            |         |                                    |                            |         |
|                          |                                    |                            |         |                                    |                            |         |
|                          |                                    |                            |         |                                    |                            |         |
|                          | <i>n</i> = 111                     | <i>n</i> = 26097           |         | <i>n</i> = 111                     | <i>n</i> = 26097           |         |
| Age                      | 82.17 (±7.41)                      | 84.83 (±7.64)              | 0.003   | 84.11 (±0.83)                      | 84.82 (±0.05)              | 0.391   |
| Sex                      | 76.58% (85/111)                    | 57.94% (15121/26097)       | <0.0001 | 60.38%                             | 58.02%                     | 0.701   |
| Emergency admission      | 92.79% (103/111)                   | 95.89% (25025/26097)       | 0.1011  | 96.08%                             | 95.90%                     | 0.927   |
| Emergency transport      | 45.05% (50/111)                    | 30.86% (8053/26097)        | 0.0012  | 70.31%                             | 69.07%                     | 0.789   |

|             |          |               |         |        |        |         |
|-------------|----------|---------------|---------|--------|--------|---------|
| Respiratory | 4.50%    | 5.41%         |         |        |        |         |
| medicine    | (5/111)  | (1411/26097)  | 0.6748  | 6.12%  | 5.40%  | 0.751   |
| Advanced    |          |               |         |        |        |         |
| treatment   | 13.51%   | 2.64%         |         |        |        |         |
| hospital    | (15/111) | (690/26097)   | <0.0001 | 2.61%  | 2.69%  | 0.898   |
| Dementia    | 64.86%   | 70.35%        |         |        |        |         |
|             | (72/111) | (18359/26097) | 0.2069  | 73.66% | 70.32% | 0.224   |
| Coma        | 10.81%   | 6.28%         |         |        |        |         |
|             | (12/111) | (1640/26097)  | 0.0502  | 5.02%  | 6.31%  | 0.479   |
| COPD        | 5.41%    | 6.53%         |         |        |        |         |
|             | (6/111)  | (1704/26097)  | 0.6323  | 15.61% | 6.52%  | 0.141   |
| Diabetes    | 0.90%    | 0.56%         |         |        |        |         |
|             | (1/111)  | (146/26097)   | 0.6308  | 0.07%  | 0.56%  | <0.0001 |
| CKD         | 18.02%   | 16.44%        |         |        |        |         |
|             | (20/111) | (4291/26097)  | 0.6550  | 18.17% | 16.45% | 0.721   |
| NTM         | 0.90%    | 0.54%         |         |        |        |         |
|             | (1/111)  | (140/26097)   | 0.6004  | 0.20%  | 0.54%  | 0.01    |
| IP          | 0.90%    | 1.05%         |         |        |        |         |
|             |          |               | 0.8807  | 0.19%  | 1.05%  | <0.0001 |

|                  |           |               |        |        |        |         |
|------------------|-----------|---------------|--------|--------|--------|---------|
|                  | (1/111)   | (273/26097)   |        |        |        |         |
| Parkinson        | 8.11%     | 7.25%         |        |        |        |         |
| syndrome         | (9/111)   | (1893/26097)  | 0.7292 | 8.26%  | 7.25%  | 0.705   |
| Sequelae of      |           |               |        |        |        |         |
| cerebrovascular  | 20.72%    | 21.92%        |        |        |        |         |
| disease          | (23/111)  | (5721/26097)  | 0.7601 | 20.72% | 21.92% | 0.744   |
| Maintenance      | 2.70%     | 0.75%         |        |        |        |         |
| dialysis         | (3/111)   | (197/26097)   | 0.0186 | 0.15%  | 0.76%  | <0.0001 |
| Pyothorax        | 1.80%     | 0.24%         |        |        |        |         |
|                  | (2/111)   | (63/26097)    | 0.001  | 0.08%  | 0.25%  | <0.0001 |
| Malignant        | 9.01%     | 12.68%        |        |        |        |         |
| neoplasms        | (10/111)  | (3310/26097)  | 0.2455 | 5.30%  | 12.67% | 0.01    |
| Malignant        |           |               |        |        |        |         |
| neoplasms in the | 1.55%     | 0.52%         |        |        |        |         |
| oral cavity      | (1/111)   | (137/26097)   | 0.5850 | 0.49%  | 0.53%  | 0.885   |
| Additional       |           |               |        |        |        |         |
| reimbursement    | 90.09%    | 90.49%        |        |        |        |         |
| for ICT          | (100/111) | (23617/26097) | 0.8840 | 94.83% | 90.49% | 0.045   |

|                                  |                    |                         |         |        |        |         |
|----------------------------------|--------------------|-------------------------|---------|--------|--------|---------|
| Additional reimbursement for AST | 51.35%<br>(57/111) | 46.67%<br>(12180/26097) | 0.3241  | 53.97% | 46.69% | 0.25    |
| Surgery                          | 5.41%<br>(6/111)   | 2.25%<br>(588/26097)    | 0.0260  | 2.16%  | 2.27%  | 0.948   |
| ICU admission                    | 0.90%<br>(1/111)   | 0.01%<br>(25/26097)     | 0.0072  | 0.13%  | 0.10%  | 0.652   |
| Steroid                          | 9.01%<br>(10/111)  | 5.03%<br>(25/26097)     | 0.0561  | 4.92%  | 5.05%  | 0.940   |
| Insulin                          | 11.71%<br>(13/111) | 5.67%<br>(1480/26097)   | 0.0061  | 6.86%  | 7.23%  | 0.689   |
| Albumin                          | 0.90%<br>(1/111)   | 1.95%<br>(51/26097)     | 0.0956  | 0.01%  | 0.20%  | <0.0001 |
| Immunoglobulin                   | 0.90%<br>(1/111)   | 0.03%<br>(7/26097)      | <0.0001 | 0.01%  | 0.03%  | 0.033   |
| Anti-influenza virus drug        | 1.80%<br>(2/111)   | 0.61%<br>(160/26097)    | 0.1108  | 0.97%  | 0.62%  | 0.262   |
| TPN                              | 6.31%              | 1.29%                   | <0.0001 | 1.37%  | 1.31%  | 0.924   |

|                   |          |               |         |        |        |       |
|-------------------|----------|---------------|---------|--------|--------|-------|
|                   | (7/111)  | (336/26097)   |         |        |        |       |
| Nasal tube        | 11.71%   | 3.54%         | <0.0001 | 3.31%  | 3.57%  | 0.813 |
| feeding           | (13/111) | (925/26097)   |         |        |        |       |
| Dysphagia         | 13.51%   | 14.40%        | 0.7897  | 14.23% | 14.40% | 0.959 |
| rehabilitation    | (15/111) | (3759/26097)  |         |        |        |       |
| Penicillin        | 56.76%   | 71.65%        | 0.0005  | 76.46% | 71.58% | 0.237 |
|                   | (63/111) | (18698/26097) |         |        |        |       |
| Macrolide         | 0.90%    | 0.31%         | 0.2663  | 0.68%  | 0.31%  | 0.430 |
|                   | (1/111)  | (81/26097)    |         |        |        |       |
| First-generation  | 1.80%    | 1.57%         | 0.8427  | 3.32%  | 1.57%  | 0.372 |
| cephalosporin     | (2/111)  | (409/26097)   |         |        |        |       |
| Second-generation | 2.70%    | 2.66%         | 0.9794  | 1.19%  | 2.66%  | 0.045 |
| cephalosporin     | (3/111)  | (695/26097)   |         |        |        |       |
| Third-generation  | 16.22%   | 22.22%        | 0.1285  | 18.73% | 22.20% | 0.353 |
| cephalosporin     | (18/111) | (5800/26097)  |         |        |        |       |

|                                 |                    |                      |         |       |       |         |
|---------------------------------|--------------------|----------------------|---------|-------|-------|---------|
| Fourth-generation cephalosporin | 1.80%<br>(2/111)   | 0.92%<br>(240/26097) | 0.3322  | 0.28% | 0.92% | <0.0001 |
| Carbapenem                      | 32.43%<br>(36/111) | 2.92%<br>(762/26097) | <0.0001 | 3.51% | 3.05% | 0.51    |
| New quinolone (IV)              | 0.90%<br>(1/111)   | 1.24%<br>(323/26097) | 0.7486  | 0.26% | 1.24% | <0.0001 |
| Minocycline                     | 1.80%<br>(2/111)   | 0.59%<br>(154/26097) | 0.0977  | 0.89% | 0.60% | 0.502   |
